# Supplementary material
Source: publisher site journal article supplement (https://www.dovepress.com/article/263811)
Supplement: Supplementary file 1 [file get_supplementary_file.php]

**Appendix.1**

Quality improvement-related activities in the Iranian Hospital

| ***Quality activities*** | **Managers/staff** | **Nurses** | **Para-clinical staff** | P-value |
| --- | --- | --- | --- | --- |
| Mean (SD) | Mean (SD) | Mean (SD) |
| **Senior managers commitment and support** | | | | |
| Senior hospital executives provide highly visible leadership in maintaining an environment that supports quality improvement. | 2.82 (0.96) | 3.04 (1.02) | 2.75 (1.16) | <0.001 |
| The top management is a primary driving force behind quality improvement efforts. | 3.14 (0.92) | 3.36 (0.89) | 2.94 (1.13) | <0.001 |
| Senior hospital executives allocate available hospital resources (e.g. finances, people, time, and equipment) to improving quality. | 3.01 (0.87) | 3.03 (0.96) | 2.78 (1.18) | 0.001 |
| Senior hospital executives consistently participate in activities to improve the quality of care and services. | 3.04 (1.01) | 3.24 (0.86) | 2.79 (1.06) | <0.001 |
| Senior hospital executives have articulated a clear vision for improving the quality of care and services. | 3.10 (0.97) | 3.21 (0.93) | 2.82 (1.09) | <0.001 |
| Senior hospital executives have demonstrated an ability to manage the changes (e.g. organizational, technological) needed to improve the quality of care and services. | 2.95 (0.77) | 3.17 (0.89) | 2.90 (0.99) | <0.001 |
| Senior hospital executives have started to act on suggestions to improve the quality of care and services. | 3.11 (0.87) | 3.19 (0.88) | 2.97 (1.10) | 0.001 |
| Based on the accreditation results, senior hospital executives have a thorough understanding of how to improve the quality of care and services. | 3.08 (1.01) | 3.29 (0.86) | 3.01 (1.01) | <0.001 |
| Senior hospital executives generate confidence that efforts to improve quality will succeed. | 3.06 (0.97) | 3.30 (0.91) | 3.00 (1.01) | <0.001 |
| *Average number of activities* | 3.04 (0.69) | 3.21 (0.68) | 2.85 (0.77) | <0.001 |
| **Strategic quality planning** **activities** | | | | |
| Employees are given adequate time to plan for and test quality improvements. | 2.81 (0.91) | 3.09 (0.93) | 3.07 (0.91) | <0.001 |
| Each department and work group within this hospital maintains specific goals to improve quality. | 3.29 (0.89) | 3.31 (0.94) | 3.18 (0.89) | 0.092 |
| The hospital’s quality improvement goals are known throughout your unit. | 3.13 (0.77) | 3.41 (0.87) | 3.18 (1.04) | <0.001 |
| Employees are involved in developing plans for improving quality. | 3.46 (0.86) | 3.42 (0.86) | 3.36 (0.90) | 0.45 |
| Middle managers play a key role in setting priorities for quality improvement. | 3.43 (0.88) | 3.39 (0.92) | 3.15 (0.91) | <0.001 |
| Patients’ expectations about quality play a key role in setting priorities for quality improvement. | 2.30 (0.88) | 3.35 (0.91) | 3.03 (0.99) | <0.001 |
| Employees play a key role in setting priorities for quality improvement through representation in the hospital’s organizational chart | 3.18 (0.99) | 3.26 (0.93) | 3.08 (1.10) | 0.016 |
| *Average number of activities* | 3.23 (0.55) | 3.32 (0.67) | 3.15 (0.77) | <0.001 |
| **Education and training** **activities** | | | | |
| Employees are given education and training in how to identify and act on quality improvement opportunities based on recommendations from accreditation surveys. | 2.61 (1.19) | 2.78 (1.13) | 2.77 (1.08) | 0.004 |
| Employees are given continuous education and training in methods that support quality improvement. | 2.71 (1.10) | 3.09 (1.03) | 2.85 (1.03) | 0.004 |
| Employees are given education and training to improve job skills and performance. | 2.75 (0.92) | 3.05 (1.95) | 2.94 (0.98) | 0.90 |
| *Average number of activities* | 2.69 (0.87) | 2.97 (0.82) | 2.86 (0.86) | 0.002 |
| **Rewards and recognition activities** | | | | |
| Employees are rewarded and recognized (e.g. financially and/or otherwise) for improving quality. | 3.00 (0.97) | 3.23 (0.94) | 3.14 (0.91) | 0.160 |
| Inter-departmental cooperation to improve the quality of services is supported and encouraged. | 3.05 (1.07) | 3.29 (0.98) | 3.19 (0.89) | <0.001 |
| The hospital has an effective system for employees to make suggestions to management on how to improve quality. | 3.05 (0.98) | 3.21 (1.04) | 3.14 (0.88) | <0.001 |
| *Average number of activities* | 3.04 (0.88) | 3.24 (0.82) | 3.16 (0.74) | <0.001 |
| **Quality management activities** | | | | |
| The hospital regularly checks equipment and supplies to make sure they meet quality requirements. | 3.01 (1.06) | 3.22 (0.93) | 3.13 (0.99) | 0.012 |
| The hospital has effective policies to support improving the quality of care and services. | 2.92 (0.91) | 3.25 (0.88) | 3.19 (0.91) | <0.001 |
| The hospital tries to design quality into new services as they are being developed. | 2.90 (1.02) | 3.18 (0.88) | 3.21 (0.93) | <0.001 |
| The services that the hospital provides are thoroughly tested for quality before they are implemented. | 2.87 (0.97) | 3.16 (0.89) | 3.22 (0.89) | <0.001 |
| The hospital views quality assurance as a continuing search for ways to improve. | 3.15 (0.82) | 3.11 (0.87) | 3.13 (0.83) | 0.824 |
| The hospital encourages employees to keep records of quality problems through documentation. | 3.02 (1.02) | 3.08 (0.95) | 3.11 (0.99) | 0.524 |
| *Average number of activities* | 2.98 (0.64) | 3.17 (0.67) | 3.16 (0.68) | 0.001 |
| **Use of data** | | | | |
| The hospital does a good job of assessing current patient needs and expectations. | 3.04 (0.96) | 3.14 (0.91) | 3.10 (0.87) | 0.390 |
| The hospital does a good job of assessing future patient needs and expectations. | 3.07 (1.01) | 3.16 (0.90) | 3.01 (0.99) | 0.048 |
| Employees promptly resolve patient complaints. | 3.49 (0.96) | 3.38 (0.91) | 3.10 (1.06) | <0.001 |
| Patients’ complaints are studied to identify patterns and learn from them to prevent the same problems from recurring. | 3.43 (1.05) | 3.38 (0.90) | 3.17 (1.02) | 0.003 |
| The hospital uses data from patients to improve services. | 3.23 (0.87) | 3.21 (0.89) | 2.89 (0.99) | <0.001 |
| Data on patient satisfaction are widely communicated to hospital staff. | 3.04 (0.91) | 3.12 (0.94) | 2.79 (0.99) | <0.001 |
| The hospital uses data on patient expectations and/ or satisfaction when designing new services. | 3.24 (0.93) | 3.19 (0.84) | 2.82 (0.98) | <0.001 |
| *Average number of activities* | 3.22 (0.69) | 3.22 (0.65) | 2.98 (0.70) | <0.001 |
| **Involvement of professionals in accreditation** | | | | |
| During the preparation for the last survey, important changes were implemented at the hospital. | 3.04 (1.08) | 3.22 (0.92) | 3.05 (0.97) | 0.004 |
| You participated in the implementation of these changes. | 3.22 (1.02) | 3.26 (1.90) | 2.89 (1.08) | <0.001 |
| You learned of the recommendations made to your hospital since the last survey (if it’s the case). | 3.18 (0.99) | 3.27 (0.89) | 2.99 (0.96) | <0.001 |
| These recommendations were an opportunity to implement important changes at the hospital. | 3.18 (1.04) | 3.28 (0.87) | 3.09 (0.91) | 0.006 |
| You participated in the changes that resulted from accreditation recommendations. | 3.12 (0.98) | 3.31 (0.92) | 3.08 (0.93) | <0.001 |
| *Average number of activities* | 3.15 (0.83) | 3.27 (0.68) | 3.02 (0.67) | <0.001 |
